# Supplementary material for: A multiscale approach to study molecular and interfacial characteristics of vesicles
Source: Royal Society of Chemistry journal article supplement (doi:10.1039/c8me00029h), 2018-01-01
Supplement: c8me00029h1.pdf [file c8me00029h1.pdf]

### Supplementary Information

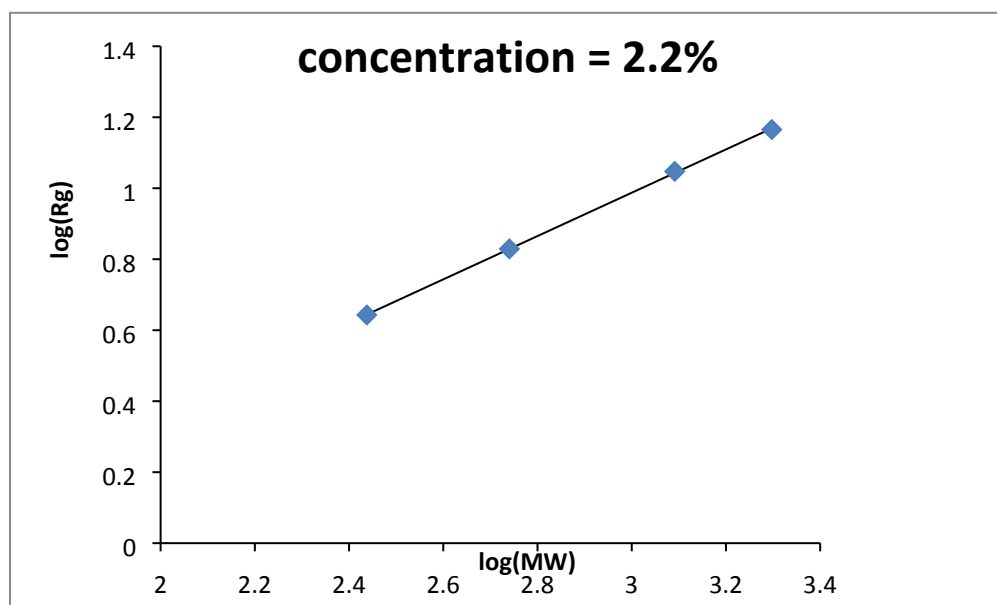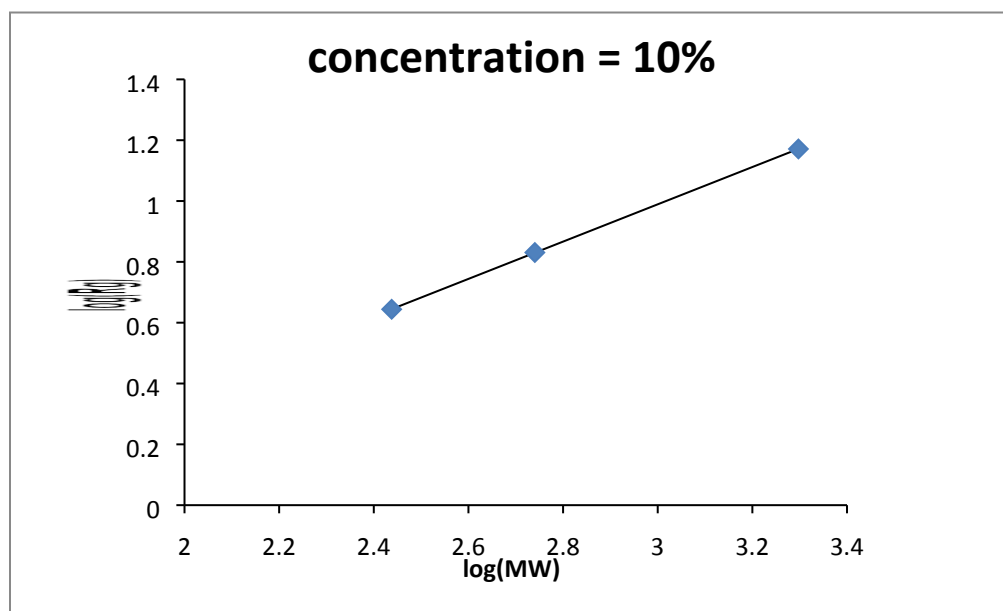

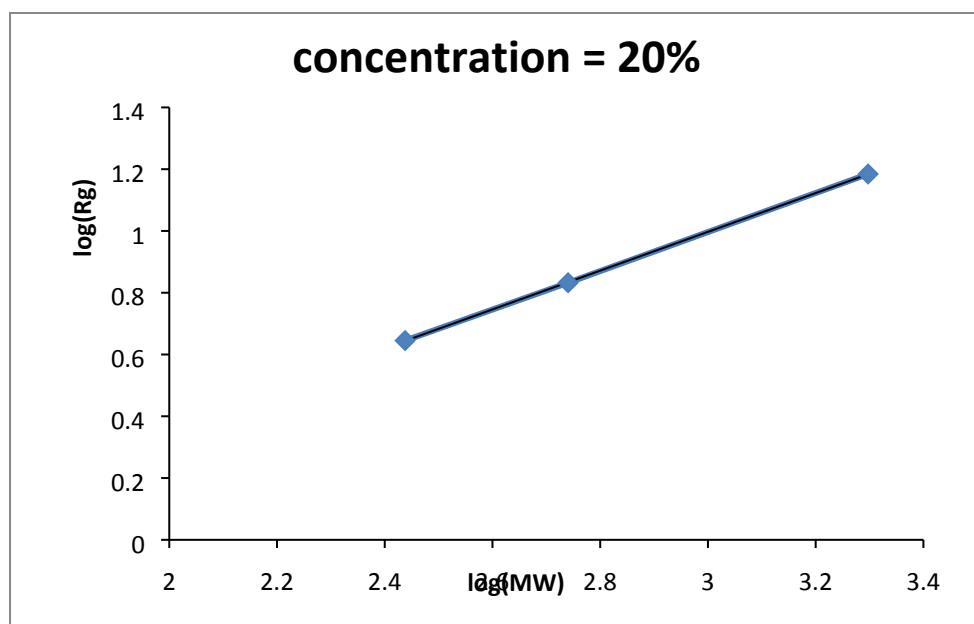

**Figure S1.** Plots of the log of the radius of gyration ( $R_g$ ) (in nm) versus log of the molecular weight (MW) for PEG chains (6,10 28, 45) of presented on outer monolayer (OM) of a vesicle. The plots are for the following relative concentrations of the PEG chains: 2.2% (top), 10% (middle) and 20% (bottom).
